# Supplementary material
Source: MDPI journal article supplement (https://www.mdpi.com/2311-7524/9/9/1053)
Supplement: s1 [file s1]

Table S1 Tetraplex qPCR of Dupas et al., [16]: reagents and master-mix used by the labs participating in the test performance study divided in five groups: A= SsoAdvanced™ Universal Probes Supermix (Bio-Rad) 60°C; B = SsoAdvanced™ Universal Probes Supermix (Bio-Rad) 63 °C; C=QuantiNova pathogen+IC kit (QIAGEN S.r.l); D = Fast Universal PCR Master Mix (Applied Biosystems); E = Brilliant multiplex QPCR Master Mix (Agilent). Primers and probes legenda: 1-XF to detect *Xylella fastidiosa* 2-XFF to detect *Xylella fastidiosa* subspecies *fastidiosa*; 3-XFM to detect *Xylella fastidiosa* subspecies *multiplex* ; 4- XFP to detect *Xylella fastidiosa* subspecies *pauca*.

Groups A and B

| Reagent                                          | Working concentration | Reaction volume (μL) | Final concentration |
|--------------------------------------------------|-----------------------|----------------------|---------------------|
| Molecular-grade water                            | N.A.                  | 2.8                  | N.A.                |
| SsoAdvanced™ Universal Probes Supermix (Bio-Rad) | 2 x                   | 5                    | 1x                  |
| Forward Primer 1-XF                              | 50 μM                 | 0.115                | 575 nM              |
| Reverse Primer 1-XF                              | 50 μM                 | 0.115                | 575 nM              |
| Probe 1-XF                                       | 50 μM                 | 0.04                 | 200 nM              |
| Forward Primer 2-XF                              | 50 μM                 | 0.115                | 575 nM              |
| Reverse Primer 2-XF                              | 50 μM                 | 0.115                | 575 nM              |
| Probe 2-XF                                       | 50 μM                 | 0.04                 | 200 nM              |
| Forward Primer 3-XF                              | 50 μM                 | 0.115                | 575 nM              |
| Reverse Primer 3-XF                              | 50 μM                 | 0.115                | 575 nM              |
| Probe 3-XF                                       | 50 μM                 | 0.04                 | 200 nM              |
| Forward Primer 4-XF                              | 50 μM                 | 0.115                | 575 nM              |
| Reverse Primer 4-XF                              | 50 μM                 | 0.115                | 575 nM              |
| Probe 4-XF                                       | 50 μM                 | 0.04                 | 200 nM              |
| BSA (non-acetylated, Invitrogen)                 | 50 μg/μL              | 0.12                 | 600 ng/μl           |
| Subtotal                                         |                       | 9                    |                     |
| DNA extract                                      |                       | 1                    |                     |
| Total                                            |                       | 10                   |                     |

Group C

| Reagent                    | Working concentration | Reaction volum (μL) | Final concentration |
|----------------------------|-----------------------|---------------------|---------------------|
| Molecular-grade water      | N.A.                  | 5,12                | N.A.                |
| QuantiNova pathogen+IC kit | 2 x                   | 10                  | 1x                  |
| Forward Primer 1-XF        | 50 μM                 | 0.32                | 800 nM              |
| Reverse Primer 1-XF        | 50 μM                 | 0.32                | 800 nM              |
| Probe 1-XF                 | 50 μM                 | 0.08                | 200 nM              |
| Forward Primer 2-XF        | 50 μM                 | 0.32                | 800 nM              |
| Reverse Primer 2-XF        | 50 μM                 | 0.32                | 800 nM              |
| Probe 2-XF                 | 50 μM                 | 0.08                | 200 nM              |
| Forward Primer 3-XF        | 50 μM                 | 0.32                | 800 nM              |
| Reverse Primer 3-XF        | 50 μM                 | 0.32                | 800 nM              |
| Probe 3-XF                 | 50 μM                 | 0.08                | 200 nM              |
| Forward Primer 4-XF        | 50 μM                 | 0.32                | 800 nM              |
| Reverse Primer 4-XF        | 50 μM                 | 0.32                | 800 nM              |
| Probe 4-XF                 | 50 μM                 | 0.08                | 200 nM              |
| Subtotal                   |                       | 18                  |                     |
| DNA extract                |                       | 2                   |                     |
| Total                      |                       | 20                  |                     |

Group D

| Reagent                              | Working concentration | Reaction volume per (μL) | Final concentration |
|--------------------------------------|-----------------------|--------------------------|---------------------|
| Molecular-grade water                | N.A.                  | 5.6                      | N.A.                |
| taqMan Fast Universal PCR Master mix | 2 x                   | 10                       | 1x                  |
| Forward Primer 1-XF                  | 50 μM                 | 0.23                     | 575 nM              |
| Reverse Primer 1-XF                  | 50 μM                 | 0.23                     | 575 nM              |
| Probe 1-XF                           | 50 μM                 | 0.08                     | 200 nM              |
| Forward Primer 2-XF                  | 50 μM                 | 0.23                     | 575 nM              |
| Reverse Primer 2-XF                  | 50 μM                 | 0.23                     | 575 nM              |
| Probe 2-XF                           | 50 μM                 | 0.08                     | 200 nM              |
| Forward Primer 3-XF                  | 50 μM                 | 0.23                     | 575 nM              |
| Reverse Primer 3-XF                  | 50 μM                 | 0.23                     | 575 nM              |
| Probe 3-XF                           | 50 μM                 | 0.08                     | 200 nM              |
| Forward Primer 4-XF                  | 50 μM                 | 0.23                     | 575 nM              |
| Reverse Primer 4-XF                  | 50 μM                 | 0.23                     | 575 nM              |
| Probe 4-XF                           | 50 μM                 | 0.08                     | 200 nM              |
| BSA (non-acetylated, Invitrogen)     | 50 μg/ μL             | 0.24                     | 600 ng/μl           |
| Subtotal                             |                       | 18                       |                     |
| DNA extract                          |                       | 2                        |                     |
| Total                                |                       | 20                       |                     |

Group E

| Reagent                             | Working concentration | Reaction volume (μL) | Final concentration |
|-------------------------------------|-----------------------|----------------------|---------------------|
| Molecular-grade water               | N.A.                  | 6.9                  | N.A.                |
| Brilliant multiplex QPCR Master mix | 2 x                   | 12.5                 | 1x                  |
| Forward Primer 1-XF                 | 50 μM                 | 0.2875               | 575 nM              |
| Reverse Primer 1-XF                 | 50 μM                 | 0.2875               | 575 nM              |
| Probe 1-XF                          | 50 μM                 | 0.1                  | 200 nM              |
| Forward Primer 2-XF                 | 50 μM                 | 0.2875               | 575 nM              |
| Reverse Primer 2-XF                 | 50 μM                 | 0.2875               | 575 nM              |
| Probe 2-XF                          | 50 μM                 | 0.1                  | 200 nM              |
| Forward Primer 3-XF                 | 50 μM                 | 0.2875               | 575 nM              |
| Reverse Primer 3-XF                 | 50 μM                 | 0.2875               | 575 nM              |
| Probe 3-XF                          | 50 μM                 | 0.1                  | 200 nM              |
| Forward Primer 4-XF                 | 50 μM                 | 0.2875               | 575 nM              |
| Reverse Primer 4-XF                 | 50 μM                 | 0.2875               | 575 nM              |
| Probe 4-XF                          | 50 μM                 | 0.1                  | 200 nM              |
| Reference dye                       |                       | 0.375                |                     |
| Subtotal                            |                       | 22.5                 |                     |
| DNA extract                         |                       | 2.5                  |                     |
| Total                               |                       | 25                   |                     |



tested for each sample in technical duplicate. Xfm = *Xylella fastidiosa* subspecies *multiplex*; Xff = *Xylella fastidiosa* subspecies *fastidiosa*; Xfp = *Xylella fastidiosa* subspecies *pauca*.

| Sample ID | Sample type<br>(DNA extract)                  | Sanitary status | Real-Time PCR Harper et al.<br>[18] |              |                 |
|-----------|-----------------------------------------------|-----------------|-------------------------------------|--------------|-----------------|
|           |                                               |                 | Pos/tot                             | min-max (Cq) | average (Cq)±SD |
| S1        | Healthy                                       | Negative        | 0/10                                | NA           | NA              |
| S2        | Healthy                                       | Negative        | 0/10                                | NA           | NA              |
| S3        | Artificially contaminated<br>(Xfm-6 pg/μL)    | Positive        | 10/10                               | 23.66-24.92  | 24.01 ± 0.25    |
| S4        | Artificially contaminated<br>(Xfm-0.6 pg/ μL) | Positive        | 10/10                               | 26.81-27.81  | 27.46 ± 0.20    |
| S5        | Artificially contaminated<br>(Xff-0.6 pg/μL)  | Positive        | 10/10                               | 28.16-28.95  | 28.34 ± 0.17    |
| S6        | Artificially contaminated<br>(Xfp-0.6 pg/μL)  | Positive        | 10/10                               | 27.97-28.36  | 28.18 ± 0.10    |
| S7        | Healthy                                       | Negative        | 0/10                                | NA           | NA              |
| S8        | Healthy                                       | Negative        | 0/10                                | NA           | NA              |
| S9        | Artificially contaminated<br>(Xfm-0.6 pg/μL)  | Positive        | 10/10                               | 26.87-27.27  | 27.06 ± 0.09    |
| S10       | Naturally infected (Xfm)                      | Positive        | 10/10                               | 23.10-25.70  | 23.97 ± 0.46    |
| S11       | Naturally infected (Xfp)                      | Positive        | 10/10                               | 25.82-27.79  | 26.33 ± 0.37    |
| S12       | Artificially contaminated<br>(Xff-6 pg/μL)    | Positive        | 10/10                               | 25.22-25.44  | 25.32 ± 0.07    |
| PAC1      | Bacterial DNA (Xff-60 pg/μL)                  | Positive        | 10/10                               | 20.67-22.88  | 21.61 ± 0.45    |
| PAC2      | Bacterial DNA (Xfm-60 pg/μL)                  | Positive        | 10/10                               | 20.58-24.53  | 20.81± 0.87     |
| PAC3      | Bacterial DNA (Xfp-60pg/μL)                   | Positive        | 10/10                               | 21.33-22.38  | 21.51 ± 0.22    |
| NAC       | Water DEPC<br>(Diethyl pyrocarbonate)         | Negative        | 0/10                                | NA           | NA              |

Table S3 Evaluation of stability of test performance study samples using Real-time PCR (Harper et al., [16]) after 7 days of storage at < -15°C, 2-8 °C and 25 °C (mid-term stability) and after 4 weeks at the end of the study (long-term stability). Three panels were tested for each sample in technical duplicate. The phytosanitary status of each sample, the number of positive samples over the total number of samples tested (pos/tot), the maximum and minimum values of the Cq (cycle threshold) obtained for each sample, the averages of the Cq values and the respective standard deviation (SD) are reported. NA = not amplified; Xfm = *Xylella fastidiosa* subspecies *multiplex*; Xff = *Xylella fastidiosa* subspecies *fastidiosa*; Xfp = *Xylella fastidiosa* subspecies *pauca*; Ac= artificially contaminated

Real-Time Harper et al. [18]

| Sample ID | Sample type<br>(DNA extract) | Status | Pos/tot |               |                  |                |                  |               |                  |             |                  |
|-----------|------------------------------|--------|---------|---------------|------------------|----------------|------------------|---------------|------------------|-------------|------------------|
|           |                              |        |         | 7 days T-20°C |                  | 7 days T 2-8°C |                  | 7 days T 25°C |                  | Deadline    | T-20°C           |
|           |                              |        |         | Min-max<br>Cq | Average<br>Cq±SD | Min-max<br>Cq  | Average<br>Cq±SD | Min-max<br>Cq | Average<br>Cq±SD | Min-max Cq  | Average<br>Cq±SD |
| S1        | Healthy                      | Neg    | 0/6     | NA            |                  |                |                  |               |                  |             |                  |
| S2        | Healthy                      | Neg    | 0/6     | NA            |                  |                |                  |               |                  |             |                  |
| S3        | Ac Xfm<br>6pg/μL             | Pos    | 6/6     | 23.95-25.33   | 24.44±0.22       | 24.03-25.24    | 24.64±0.35       | 23.37-26.10   | 24.77±0.83       | 24.16-25.09 | 24.84±0.36       |
| S4        | Ac Xfm<br>0.6pg/μL           | Pos    | 6/6     | 26.91-27.79   | 27.41±0.19       | 27.71-28.66    | 28.19±0.08       | 27.17-27.78   | 27.51±0.14       | 27.80-28.12 | 28.00±0.13       |
| S5        | Ac Xff<br>0.6pg/μl           | Pos    | 6/6     | 28.33-29.95   | 28.76±0.13       | 28.46-29.42    | 28.89±0.38       | 27.16-29.45   | 28.54±0.66       | 28.97-29.16 | 29.08±0.06       |
| S6        | Ac Xfp<br>0.6pg/μL           | Pos    | 6/6     | 28.24-28.82   | 28.41±0.08       | 27.49-28.70    | 28.15±0.32       | 27.46-29.02   | 28.61±0.09       | 28.89-29.09 | 29.00±0.08       |
| S7        | Healthy                      | Negg   | 0/6     | NA            |                  |                |                  |               |                  |             |                  |
| S8        | Healthy                      | Neg    | 0/6     | NA            |                  |                |                  |               |                  |             |                  |

|                  |                                  |     |     |             |            |             |            |             |            |             |            |
|------------------|----------------------------------|-----|-----|-------------|------------|-------------|------------|-------------|------------|-------------|------------|
| <b>S9</b>        | Ac Xfm<br>0.6pg/μ<br>L           | Pos | 6/6 | 27.15-28.60 | 27.95±0.37 | 27.29-28.48 | 27.79±0.32 | 26.26-28.21 | 27.62±0.23 | 27.79-28.08 | 27.95±0.12 |
| <b>S10</b>       | Naturall<br>y<br>infected<br>Xfm | Pos | 6/6 | 23.16-26.24 | 25.08±1.38 | 24.83-25.11 | 24.94±0.06 | 23.68-25.27 | 24.62±0.35 | 25.07-25.49 | 25.24±0.17 |
| <b>S11</b>       | Naturall<br>y<br>infected<br>Xfp | Pos | 6/6 | 25.47-27.31 | 26.35±0.59 | 26.26-26.84 | 26.53±0.22 | 24.89-25.93 | 25.46±0.26 | 26.66-27.27 | 27.03±0.23 |
| <b>S12</b>       | Ac Xff<br>6pg/μL                 | Pos | 6/6 | 24.19-26.30 | 25.58±0.85 | 25.43-26.20 | 25.89±0.14 | 23.93-25.63 | 25.11±0.12 | 25.14-26.09 | 25.84±0.37 |
| <b>PAC<br/>1</b> | l DNA<br>Xff 60<br>pg/μL         | Pos | 6/6 | 21.87-22.42 | 22.21±0.19 | 21.46-23.20 | 22.15±0.18 | 20.45-22.57 | 21.93±0.33 | 22.15-25.10 | 23.90±0.99 |
| <b>PAC<br/>2</b> | DNA<br>Xfm 60<br>pg/μL           | Pos | 6/6 | 21.46-24.65 | 23.24±1.00 | 22.65-23.46 | 23.08±0.25 | 21.95-24.14 | 23.19±0.55 | 23.05-25.83 | 24.15±1.00 |
| <b>PAC<br/>3</b> | DNA<br>Xfp 60<br>pg/μL           | Pos | 6/6 | 22.56-24.83 | 23.56±0.54 | 22.53-23.95 | 23.46±0.31 | 21.81-22.39 | 22.07±0.13 | 24.13-24.91 | 24.58±0.31 |
| <b>NAC</b>       | Water<br>DEPC                    |     |     |             |            |             | NA         |             |            |             |            |

Table S4 Results obtained in Real-Time PCR according to Harper et al. [18] and in tetraplex Real-Time PCR (Dupas et al. [16]) concerning *Xylella fastidiosa* identification. The phytosanitary status of each sample, the averages of the Cq values and the respective standard deviation value is reported. Legend: Cq = threshold cycle; SD= standard deviation; NA not amplified Xfm = *Xylella fastidiosa* subspecies *multiplex*; Xff = *Xylella fastidiosa* subspecies *fastidiosa*; Xfp = *Xylella fastidiosa* subspecies *pauca*.

|         |       | A       |       |         |       | B       |       |         |       | C       |       |         |       | D       |       |         |       | E       |       |         |  |
|---------|-------|---------|-------|---------|-------|---------|-------|---------|-------|---------|-------|---------|-------|---------|-------|---------|-------|---------|-------|---------|--|
|         |       | Dupas   |       | Harper  |  |
|         |       | et al., |  |
|         |       | 2019    |       | 2010    |       | 2019    |       | 2010    |       | 2019    |       | 2010    |       | 2019    |       | 2010    |       | 2019    |       | 2010    |  |
| Sample  |       |         |       |         |       |         |       |         |       |         |       |         |       |         |       |         |       |         |       |         |  |
| ID      | Cq M  | SD      |  |
| S1      | NA    | NA      |  |
| S2      | NA    | NA      |  |
| S3      | 24.85 | 0.87    | 24.38 | 0.89    | 26.90 | 1.19    | 25.05 | 1.48    | 26.40 | 1.43    | 26.24 | 0.28    | 24.86 | 0.64    | 26.23 | 0.53    | 25.08 | 0.78    | 25.16 | 1.64    |  |
| S4      | 27.95 | 1.46    | 27.67 | 0.78    | 29.64 | 0.72    | 28.26 | 1.37    | 29.23 | 0.47    | 27.23 | 2.72    | 27.78 | 0.57    | 27.44 | 2.91    | 28.29 | 1.11    | 25.30 | 1.34    |  |
| S5      | 30.24 | 1.94    | 28.65 | 0.94    | 30.66 | 0.82    | 29.27 | 1.36    | 29.84 | 0.49    | 28.51 | 2.59    | 28.83 | 0.64    | 28.69 | 2.71    | 29.29 | 1.30    | 26.78 | 1.36    |  |
| S6      | 28.53 | 0.35    | 28.34 | 0.84    | 30.44 | 0.65    | 28.97 | 1.52    | 29.77 | 0.73    | 28.11 | 2.89    | 28.55 | 0.78    | 28.25 | 2.98    | 28.76 | 0.75    | 26.43 | 1.77    |  |
| S7      | NA    | NA      |  |
| S8      | NA    | NA      |  |
| S9      | 27.80 | 1.40    | 27.42 | 0.98    | 29.90 | 1.26    | 28.23 | 1.46    | 29.21 | 0.64    | 26.97 | 3.19    | 28.15 | 0.44    | 27.30 | 3.51    | 28.18 | 1.24    | 24.95 | 1.91    |  |
| S10     | 24.95 | 1.25    | 25.15 | 0.83    | 26.76 | 1.04    | 25.23 | 1.43    | 26.99 | 0.57    | 26.36 | 0.92    | 25.44 | 0.45    | 26.73 | 0.51    | 25.63 | 0.76    | 25.54 | 1.76    |  |
| S11     | 26.97 | 1.35    | 26.64 | 0.89    | 27.77 | 1.40    | 27.05 | 1.55    | 28.79 | 1.53    | 27.81 | 0.71    | 27.11 | 1.12    | 28.51 | 0.50    | 27.05 | 0.95    | 26.91 | 1.20    |  |
| S12     | 25.90 | 1.67    | 24.76 | 1.07    | 27.82 | 1.07    | 26.13 | 1.40    | 27.44 | 0.58    | 26.86 | 0.93    | 25.59 | 1.06    | 26.97 | 0.79    | 26.14 | 1.02    | 26.17 | 1.58    |  |
| PAC1Xff | 23.44 | 1.95    | 22.51 | 0.76    | 24.81 | 1.56    | 24.04 | 3.92    | 26.30 | 2.09    | 24.20 | 1.65    | 24.07 | 1.90    | 24.84 | 2.25    | 24.01 | 1.73    | 22.76 | 0.54    |  |
| PAC2Xfm | 23.99 | 1.10    | 23.87 | 0.67    | 25.19 | 0.93    | 25.34 | 2.48    | 26.57 | 2.82    | 23.36 | 1.00    | 23.94 | 1.04    | 22.93 | 0.81    | 24.30 | 1.07    | 22.39 | 0.05    |  |
| PAC3Xfp | 24.52 | 1.53    | 23.00 | 1.04    | 25.24 | 2.06    | 24.91 | 2.60    | 27.21 | 2.81    | 25.48 | 1.84    | 25.12 | 1.63    | 24.39 | 1.15    | 24.86 | 1.35    | 23.97 | 0.59    |  |
| NAC     | NA    | NA      |  |
